# Supplementary material
Source: Springer Nature journal article supplement (https://www.springermedizin.de/resource/supplementary/12913_2012_2067_MOESM2_ESM.pdf/9529704)

Statutory health insurance

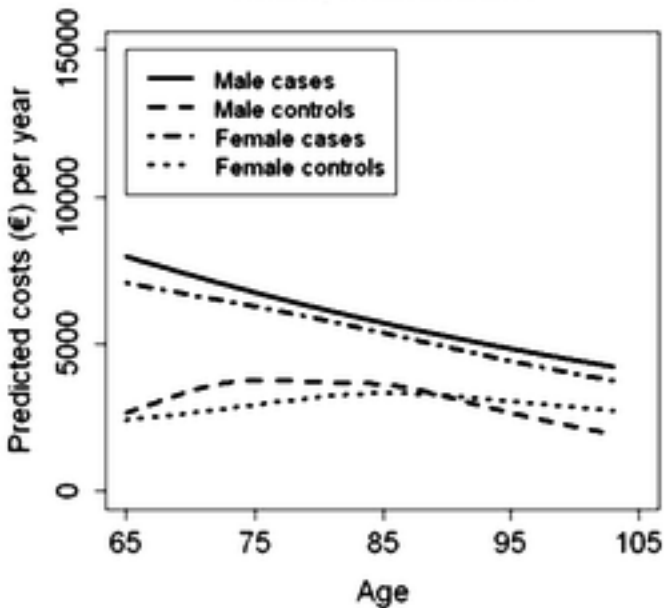

Compulsory long-term care insurance

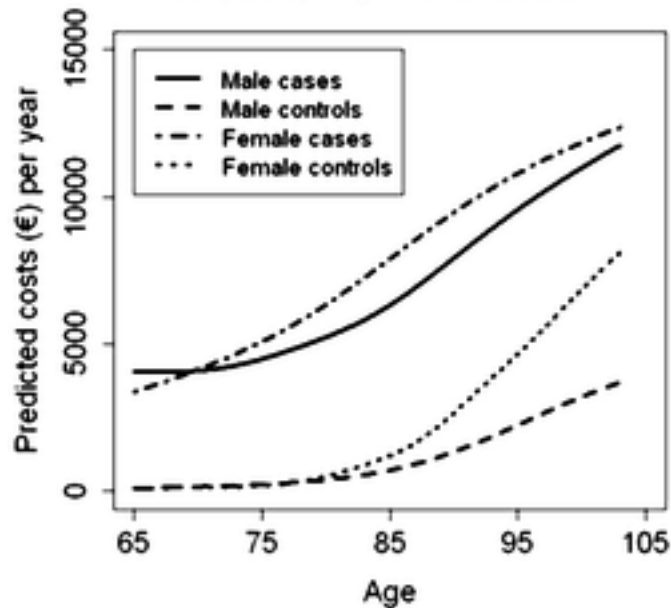

Formal care

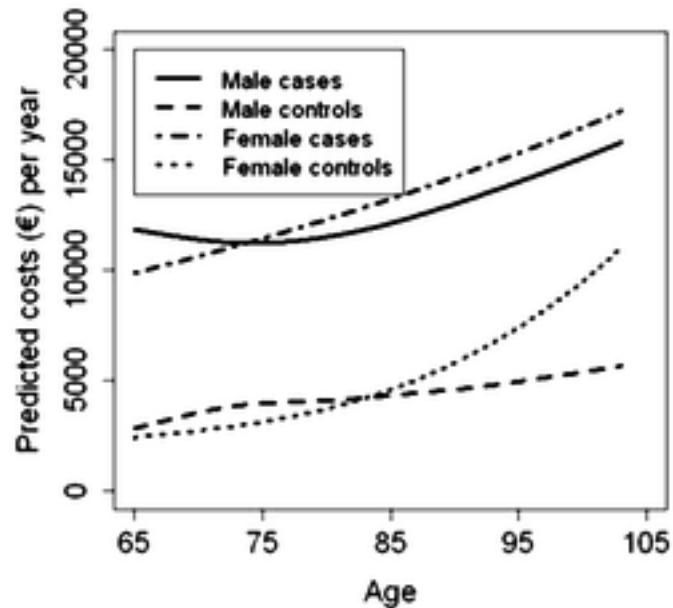

Supplement: MOESM2 [file 9529704]
